# Supplementary material for: Reduction of Cr(VI) by Bacillus toyonensis LBA36 and its effect on radish seedlings under Cr(VI) stress
Source: PeerJ. 2024 Sep 24;12:e18001. doi: 10.7717/peerj.18001 (PMC11430171; doi:10.7717/peerj.18001)
Supplement: Supplemental Information 2 [file peerj-12-18001-s002.xlsx]

## Sheet: Figure 3（A）
Growth curve of LBA36 strain
Time（h）	0mg·L-1	0mg·L-1	0mg·L-1	30mg·L-1	30mg·L-1	30mg·L-1	60mg·L-1	60mg·L-1	60mg·L-1	90mg·L-1	90mg·L-1	90mg·L-1	120mg·L-1	120mg·L-1	120mg·L-1	150mg·L-1	150mg·L-1	150mg·L-1	B:D average value	B:D standard deviation	E:G average value	E:G standard deviation	H:J average value	H:J standard deviation	K:M average value	K:M standard deviation	N:P average value	N:P standard deviation	Q:S average value	Q:S standard deviation
0	0.106	0.106	0.105	0.104	0.1	0.099	0.104	0.101	0.104	0.1	0.11	0.105	0.105	0.109	0.102	0.106	0.103	0.102	0.10567	0.00057735	0.101	0.00265	0.103	0.00173	0.105	0.005	0.10533	0.00351	0.10367	0.00208
8	3.27	2.98	3.09	2.08	2.06	2.04	0.751	0.658	0.669	0.309	0.303	0.306	0.219	0.291	0.354	0.109	0.108	0.106	3.11333	0.1464	2.06	0.02	0.69267	0.05082	0.306	0.003	0.288	0.06755	0.10767	0.00153
16	4.59	4.87	4.83	4.49	4.33	4.44	0.896	0.901	0.953	0.73	0.8	0.46	0.321	0.33	0.399	0.11	0.108	0.103	4.76333	0.15144	4.42	0.08185	0.91667	0.03156	0.66333	0.17954	0.35	0.04267	0.107	0.00361
24	5.51	5.47	5.21	5.67	5.49	5.82	1.48	1.39	1.48	0.59	0.58	0.53	0.36	0.44	0.48	0.113	0.109	0.107	5.39667	0.16289	5.66	0.16523	1.45	0.05196	0.56667	0.03215	0.42667	0.0611	0.10967	0.00306
32	5.91	5.39	5.31	5.88	6	6.02	2.01	2.21	2.29	0.54	0.54	0.54	0.45	0.35	0.63	0.121	0.11	0.109	5.53667	0.32578	5.96667	0.07572	2.17	0.14422	0.54	0	0.47667	0.14189	0.11333	0.00666
40	5.89	5.44	5.55	6.09	6.16	6.12	2.58	2.69	2.75	0.47	0.45	0.47	0.4	0.33	0.36	0.247	0.143	0.151	5.62667	0.23459	6.12333	0.03512	2.67333	0.08622	0.46333	0.01155	0.36333	0.03512	0.18033	0.05787
48	5.88	5.43	5.77	6.22	6.21	6.09	3.06	3.21	3.42	0.41	0.38	0.4	0.368	0.258	0.318	0.219	0.194	0.547	5.69333	0.23459	6.17333	0.07234	3.23	0.18083	0.39667	0.01528	0.31467	0.05508	0.32	0.19698
56	5.94	5.4	5.66	6.32	6.26	6.01	4.66	4.95	4.77	0.37	0.3	0.38	0.25	0.47	0.26	0.45	0.15	0.18	5.66667	0.27006	6.19667	0.16442	4.79333	0.1464	0.35	0.04359	0.32667	0.12423	0.26	0.16523
64	5.55	5.31	5.46	6.28	6.32	6.11	4.86	4.98	4.82	0.38	0.34	0.36	0.31	0.45	0.28	0.52	0.19	0.21	5.44	0.12124	6.23667	0.1115	4.88667	0.08327	0.36	0.02	0.34667	0.09074	0.30667	0.18502
72	4.98	5.25	5.25	6.31	6.26	6.25	5.1	5.29	4.98	0.228	0.49	0.451	0.036	0.446	0.3	0.383	0.457	0.401	5.16	0.15588	6.27333	0.03215	5.12333	0.15631	0.38967	0.14136	0.26067	0.20781	0.41367	0.03859
80	4.62	4.65	4.89	5.99	6.03	6.15	4.99	5.31	5.29	0.301	0.502	0.531	0.339	0.398	0.283	0.261	0.269	0.372	4.72	0.14799	6.05667	0.08327	5.19667	0.17926	0.44467	0.12526	0.34	0.05751	0.30067	0.06191
88	4.71	4.5	4.35	5.96	5.88	5.9	5.04	5.26	5.35	0.309	0.496	0.544	0.286	0.38	0.282	0.395	0.42	0.24	4.52	0.18083	5.91333	0.04163	5.21667	0.15948	0.44967	0.12416	0.316	0.05546	0.35167	0.09751

## Sheet: Figure 3（B）
Cr(VI) reduction and adsorption efficiency of strain LBA36
Cr(VI) concentration (mg·L-1)	Reduction rate of experimental group (%)			Reduction rate of control group (%)			Adsorption rate (%)			B:D average value	B:D standard deviation	E:G average value	E:G standard deviation	H:J average value	H:J standard deviation
30mg·L-1	94.6759	98.1482	94.9074	18.0247	9.87654	17.5309	9.231	8.96	8.697	95.9105	1.94132	15.144	4.56846	8.96267	0.26701
60mg·L-1	70.6813	70.6813	76.5207	11.4634	12.1951	11.7073	6.94444	7.21	7.35	72.6277	3.37138	11.7886	0.37257	7.16815	0.20599
90mg·L-1	28.5366	29.7561	29.7561	9.85401	6.93431	6.93431	5.691	6.2	6.429	29.3496	0.70408	7.90754	1.68569	6.10667	0.37775

## Sheet: Figure 3（C）
Effect of time on the efficiency of LBA36 strain in treating Cr(VI)
Time (h)	Reduction rate of experimental group (%)			Reduction rate of control group (%)			Adsorption rate (%)			B:D average value	B:D standard deviation	E:G average value	E:G standard deviation	H:J average value	H:J standard deviation
0	5.13651	4.96256	6.91345	1.12187	1.89879	5.88658	0	0	0	5.67084	1.07964	2.96908	2.55632	0	0
8	26.3538	22.946	27.1585	1.29865	2.18135	7.81824	2.5198	4.12	3.1	25.4861	2.23628	3.76608	3.53692	3.2466	0.81011
16	71.1658	68.5968	74.1816	4.00859	4.47455	7.33	3.4986	4.60465	3.11554	71.3148	2.79536	5.27105	1.79826	3.7396	0.773254
24	93.3333	93.3333	93.3333	6.76985	8.88754	9.1968	4.9168	5.95134	4.02498	93.3333	0	8.28473	1.32101	4.96437	0.964061
32	94.9248	94.9248	94.9248	7.16985	9.16785	11.2983	8.62169	9.21587	8.75837	94.9248	0	9.21202	2.0646	8.86531	0.311191
40	97.25	96.8874	96.8984	11.748	12.4687	15.1869	7.82515	8.2896	7.68545	97.0119	0.206219	13.1345	1.81359	7.9334	0.316288
48	97.7659	97.5658	97.8893	13.1499	14.4698	17.8464	6.81485	7.14868	7.0186	97.7404	0.163251	15.1553	2.42214	6.99404	0.168264
56	97.8986	98.0987	97.8614	18.2684	19.8764	22.999	6.35869	6.84656	6.5012	97.9529	0.127612	20.3812	2.40537	6.56882	0.250865

## Sheet: Figure 3（D）
Reducing capacity of different fractions in strain LBA36
Bacterial components	Reduction rate %			B:D average value	B:D standard deviation
Extracellular	30.18	30.6985	33.519	31.4658	1.79687
Rest	27.7852	27.7519	27.7478	27.7616	0.0204603
Osmosis	21.0985	19.544	16.947	19.1965	2.09745
Intracellular extract	9.11584	9.15466	9.81684	9.36245	0.393995

## Sheet: Figure 5（A）
Radish seedling seed germination.
Cr(VI) concentration (mg·L-1)	Germination rate of experimental group			Germination rate of control group			B:D average value	B:D standard deviation	E:G average value	E:G standard deviation
0	62	63	62	52	52	52	62.3333	0.57735	52	0
30	61	60	60	51	52	51	60.3333	0.57735	51.3333	0.57735
60	60	59	59	52	50	50	59.3333	0.57735	50.6667	1.1547
90	60	59	59	50	51	50	59.3333	0.57735	50.3333	0.57735
100	58	58	58	50	49	49	58	0	49.3333	0.57735
200	53	55	53	50	48	48	53.6667	1.1547	48.6667	1.1547
400	50	52	50	45	42	42	50.6667	1.1547	43	1.73205

## Sheet: Figure 5（B）
Weight of radish seedlings
Cr(VI) concentration (mg·L-1)	Weight of experimental group			Weight of control group			B:D average value	B:D standard deviation	E:G average value	E:G standard deviation
0	1.1158	1.1129	1.1135	1.379	1.359	1.365	1.11407	0.0015308	1.36767	0.0102632
30	1.1605	1.1599	1.1601	1.5528	1.5469	1.5488	1.16017	0.000305505	1.5495	0.00301164
60	1.6581	1.6621	1.6595	1.453	1.456	1.453	1.6599	0.00202978	1.454	0.00173205
90	1.5613	1.5578	1.5589	1.2825	1.2894	1.2835	1.55933	0.00178979	1.28513	0.00372872
100	1.2656	1.2596	1.2611	1.2471	1.2506	1.2487	1.2621	0.0031225	1.2488	0.00175214
200	0.7015	0.6869	0.6925	0.6657	0.6647	0.6649	0.693633	0.00736569	0.6651	0.00052915
400	0.6159	0.6099	0.611	0.6067	0.5998	0.5984	0.612267	0.00319427	0.60325	0.00487904

## Sheet: Figure 5（C）
Radish seedling root length
Cr(VI) concentration (mg·L-1)	Root length of experimental group			Root length of control group			B:D average value	B:D standard deviation	E:G average value	E:G standard deviation
0	6	6.2	6	10	9.8	9.8	6.06667	0.11547	9.86667	0.11547
30	3.5	3.6	3.5	3.5	3.6	3.5	3.53333	0.057735	3.53333	0.057735
60	3.6	3.4	3.4	2.8	2.6	2.6	3.46667	0.11547	2.66667	0.11547
90	3	2.9	2.9	1.5	1.6	1.5	2.93333	0.057735	1.53333	0.057735
100	2.5	2.5	2.5	1.5	1.4	1.4	2.5	0	1.43333	0.057735
200	0.2	0.1	0.1	0.1	0.1	0.1	0.133333	0.057735	0.1	0
400	0.1	0.2	0.1	0.1	0.1	0.1	0.133333	0.057735	0.1	0

## Sheet: Figure 5（D）
Radish seedling diameter
Cr(VI) concentration (mg·L-1)	Path length of experimental group			Path length of control group			B:D average value	B:D standard deviation	E:G average value	E:G standard deviation
0	8.5	8.3	8.3	10.1	9.8	9.8	8.36667	0.11547	9.9	0.173205
30	9.3	9	9.1	11	10.8	10.9	9.13333	0.152753	10.9	0.1
60	8.7	8.5	8.5	10.6	10.3	10.3	8.56667	0.11547	10.4	0.173205
90	8.5	8.3	8.3	10	10.3	10.1	8.36667	0.11547	10.1333	0.152753
100	8	7.9	7.9	6	6.3	6.1	7.93333	0.057735	6.13333	0.152753
200	6.2	6	6	5	5.2	5	6.06667	0.11547	5.06667	0.11547
400	4.2	4	4	3.5	3.3	3.3	4.06667	0.11547	3.36667	0.11547

## Sheet: Figure 5（E）
Weight of radish seedlings
Cr(VI) concentration (mg·L-1)	Weight of experimental group			Weight of control group			B:D average value	B:D standard deviation	E:G average value	E:G standard deviation
0	0.96	0.961	0.96	0.8	0.81	0.8	0.960333	0.00057735	0.803333	0.0057735
1	0.935	0.934	0.934	0.31	0.312	0.31	0.934333	0.00057735	0.310667	0.0011547
2	1.14	1.142	1.14	0.305	0.31	0.306	1.14067	0.0011547	0.307	0.00264575
3	1.515	1.517	1.515	0.225	0.224	0.224	1.51567	0.0011547	0.224333	0.00057735
4	1.425	1.426	1.425	0.175	0.178	0.176	1.42533	0.00057735	0.176333	0.00152753
5	0.885	0.887	0.885	0.165	0.167	0.165	0.885667	0.0011547	0.165667	0.0011547
6	0.855	0.86	0.856	0.125	0.126	0.125	0.857	0.00264575	0.125333	0.00057735
7	0.81	0.82	0.812	0.1	0.1	0.1	0.814	0.0052915	0.1	0

## Sheet: Figure 5（F）
Radish seedling root length
Cr(VI) concentration (mg·L-1)	Length of experimental group			Length of control group			B:D average value	B:D standard deviation	E:G average value	E:G standard deviation
0	26.5	26.6	26.5	18.5	18.51	18.5	26.5333	0.057735	18.5033	0.0057735
1	20.25	20.3	20.27	13	13.1	13	20.2733	0.0251661	13.0333	0.057735
2	21.9	21.9	21.8	14.75	14.7	14.72	21.8667	0.057735	14.7233	0.0251661
3	22.75	22.8	22.72	14.25	14.3	14.25	22.7567	0.0404145	14.2667	0.0288675
4	24.25	24.3	24.25	13.25	13.4	13.28	24.2667	0.0288675	13.31	0.0793725
5	17.75	17.8	17.76	12	12.2	12	17.77	0.0264575	12.0667	0.11547
6	16.3	16.34	16.3	11.75	11.8	11.75	16.3133	0.023094	11.7667	0.0288675
7	14.75	14.7	14.71	9.25	9.3	9.26	14.72	0.0264575	9.27	0.0264575

[truncated: 8 more sheets: Figure 6（A）, Figure 6（B）, Figure 6（C）, Figure 6（D）, Figure 6（E）, Figure 7（A）, Figure 7（B）, Figure 7（C）]
